# Supplementary material for: Nitrogen, Phosphorus, and Snowmelt Runoff Losses after Application of Dairy Manure with Variable Solids Content
Source: MDPI journal article supplement (doi:10.3390/w14223745), 2022-11-18
Supplement: s1 [file s1]

## Supplemental Figures

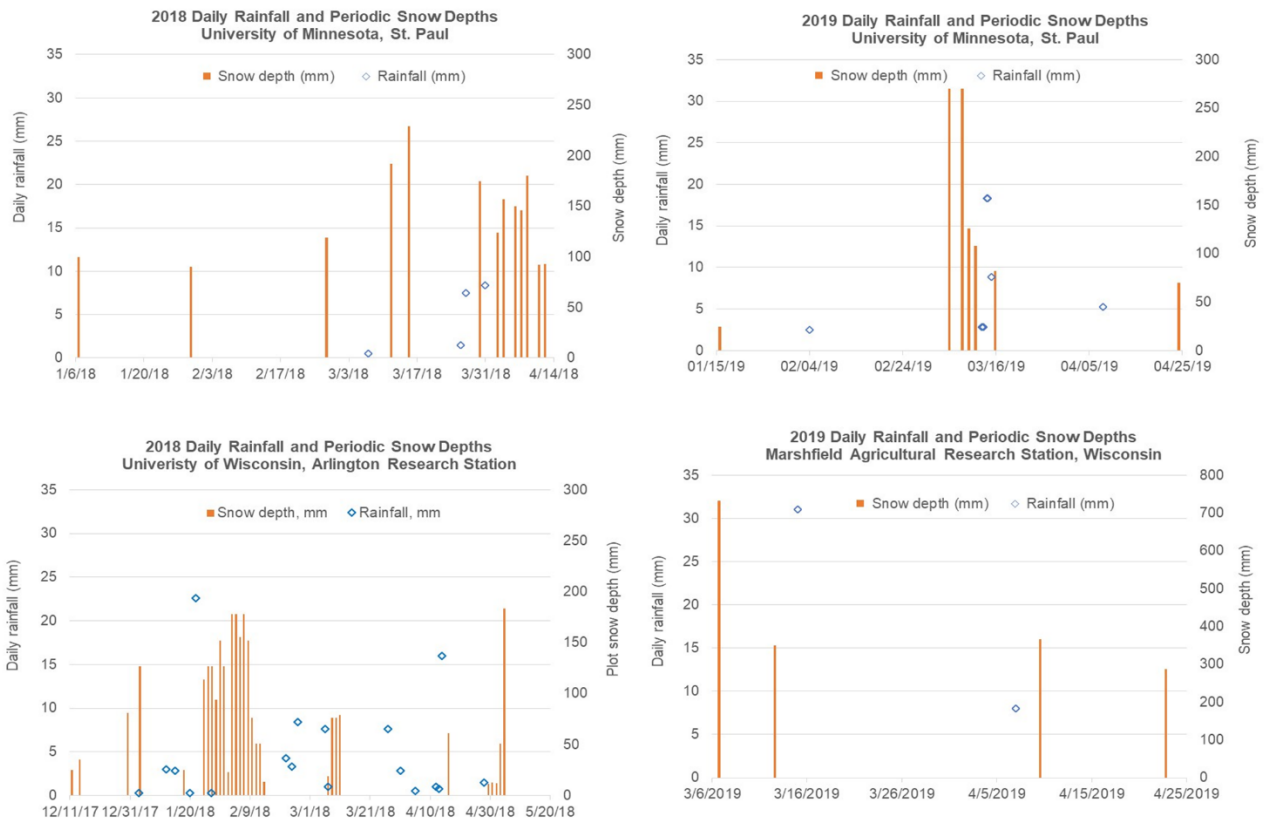

Supplemental Figure S1. Snowfall and precipitation recorded during the study period at each site. Note snow plot depth information was not available for Arlington in 2017 and not presented.

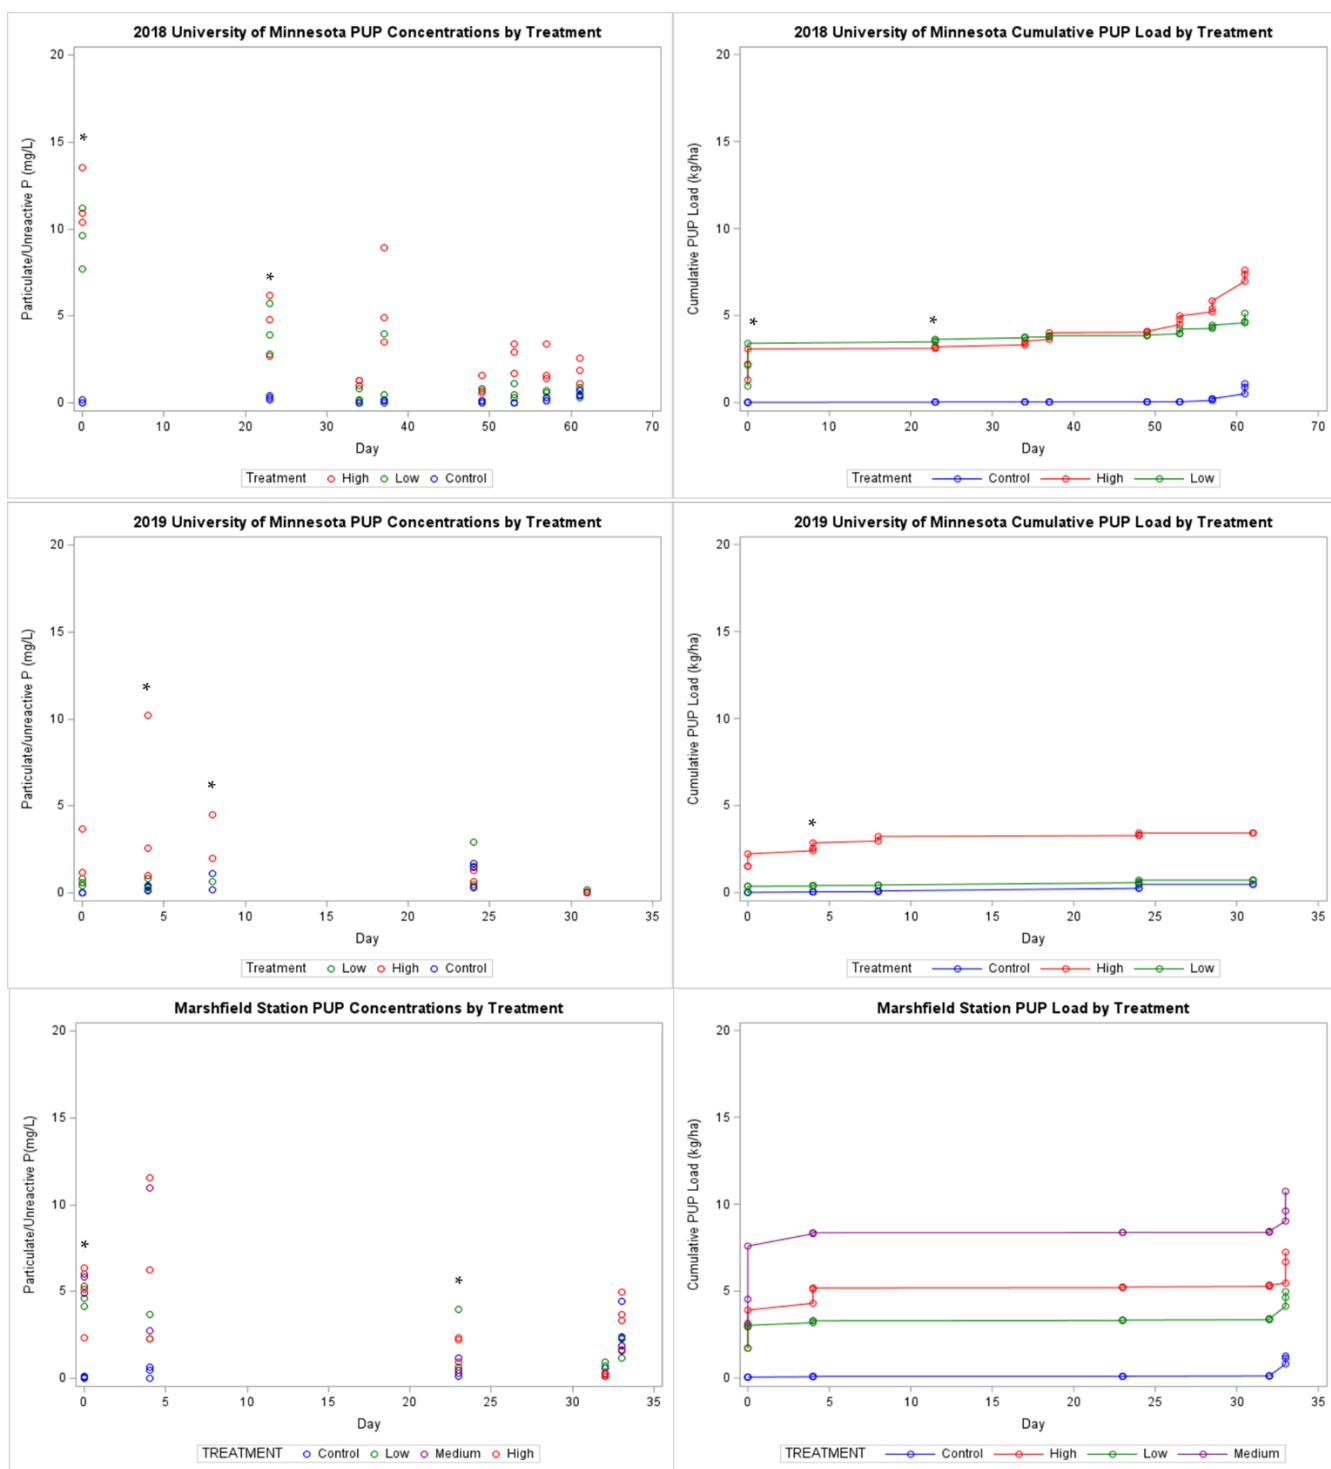

Supplemental Figure S2. Snowmelt runoff particulate/unreactive P (PUP) concentrations and loads by treatment for each site and year of the experiment. Asterisks indicate a significant ( $P \leq 0.05$ ) main effect of manure solids. Cumulative loads without a common lower case letter differ ( $P \leq 0.05$ ).

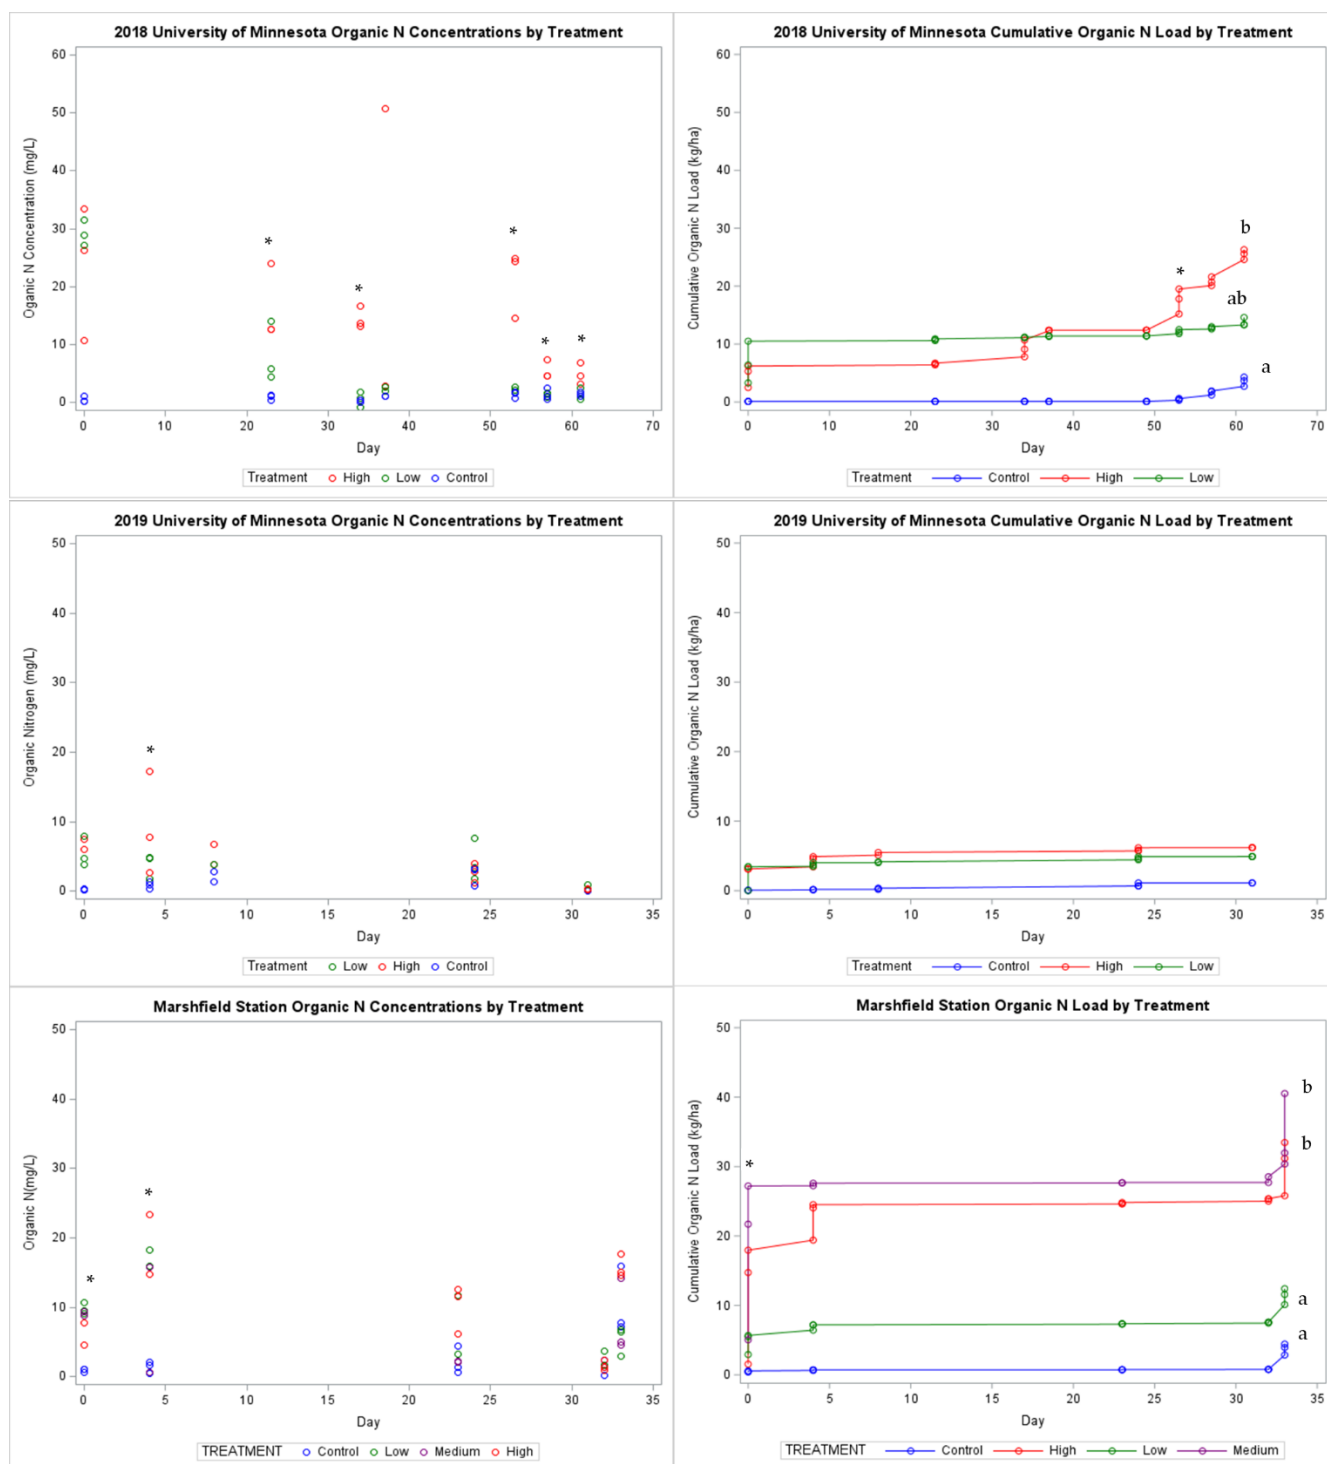

Supplemental Figure S3. Snowmelt runoff organic nitrogen concentrations and loads by treatment for each site and year of the experiment. Asterisks indicate a significant ( $P \leq 0.05$ ) main effect of manure solids. Cumulative loads without a common lower case letter differ ( $P \leq 0.05$ ).
